# Supplementary material
Source: PubMed Central journal article supplement (PMC3091179)
Supplement: supp_M110.207779_jbc.M110.207779-1.pdf [file supp_M110.207779_jbc.M110.207779-1.pdf]

**Supplementary table 1**

| <b>Construct Name</b>          | <b>PCR Primer Sequence</b>                                                                         | <b>Digestion Sites</b> |
|--------------------------------|----------------------------------------------------------------------------------------------------|------------------------|
| Plin1-EYFP-C1<br>(plin1-YFP)   | Forward 5'-TAGAGCTCGGATGTCAATGAACAAGGGCC-3'<br>Reverse 5'-TAGGTACCGCAGTCTGCTCAGCTCTTCTTGC-3'       | SacI /KpnI             |
| Plin2-EYFP-C1<br>(plin2-YFP)   | Forward 5'-TAGGTACCAAAATGGGAGCAGCAGTAGTGGAT-3'<br>Reverse 5'-TAGGTACCAGGAGGGTTTACTGAGCTTTGAC-3'    | KpnI /KpnI             |
| Plin3-EYFP-C1<br>(plin3-YFP)   | Forward 5'-TAGAGCTCCCATGTCTAGCAATGGTACAGAT-3'<br>Reverse 5'-TAGGTACCTCCCTACTTCCCTTCAGGGGTTT-3'     | SacI /KpnI             |
| Plin5-EYFP-C1<br>(plin5-YFP)   | Forward 5'-TAGAGCTCAGGAAATGGACCAGAGAGGTGAAG-3'<br>Reverse 5'-TAGGTACCCCTCGATAGTCAGAAGTCCAGCTC-3'   | SacI /KpnI             |
| Plin5 (1-188)<br>-EYFP-C1      | Forward 5'-TAGAGCTCAGGAAATGGACCAGAGAGGTGAAG-3'<br>Reverse 5'-TAGCGGTACCTCCTATAGCTCAGCCTCAGTCAT-3'  | SacI /KpnI             |
| Plin5 (1-391)<br>-EYFP-C1      | Forward 5'-TAGAGCTCAGGAAATGGACCAGAGAGGTGAAG-3'<br>Reverse 5'-TAGCGGTACCTCCTACCCACAAGCCAGGGCAG-3'   | SacI /KpnI             |
| ATGL-ECFP-C1<br>(ATGL-CFP)     | Forward 5'-CAGTAGATCTTTCCCGAGGGAGACCAAGTGG-3'<br>Reverse 5'-TAATAAGCTTTCAGCAAGGCGGGAGGCCAGGT-3'    | BglII /HindIII         |
| CGI-58-EYFP-C1<br>(CGI-58-YFP) | Forward 5'-CAGTAAGCTTCGAAAGCGATGGCGGGCGGAGGA-3'<br>Reverse 5'-CCGTCGGATCCTCAGTCTACTGTGTGGCAGATC-3' | HindIII /BamHI         |
| CGI-58-ECFP-C1<br>(CGI-58-CFP) | Forward 5'-CAGTAAGCTTCGAAAGCGATGGCGGGCGGAGGA-3'<br>Reverse 5'-CCGTCGGATCCTCAGTCTACTGTGTGGCAGATC-3' | HindIII /BamHI         |
